# Supplementary material for: Radiation-Induced Metabolic Shifts in the Hepatic Parenchyma: Findings from 18F-FDG PET Imaging and Tissue NMR Metabolomics in a Mouse Model for Hepatocellular Carcinoma
Source: MDPI journal article supplement (doi:10.3390/molecules26092573), 2021-04-28
Supplement: s1 [file s1]

**Table S1. Sequences of primers used for quantitative PCR reactions.**

| <b>Gene name</b> | <b>Primer sequence (5'-3')</b> | <b>Product size (bp)</b> |
|------------------|--------------------------------|--------------------------|
| <i>β-actin</i> F | ACCCTAAGGCCAACCGTGAA           | 193                      |
| <i>β-actin</i> R | ATGGCGTGAGGGAGAGCATAG          |                          |
| <i>IL-18</i> F   | CAGGCCTGACATCTTCTGCAA          | 105                      |
| <i>IL-18</i> R   | TCTGACATGGCAGCCATTGT           |                          |
| <i>HIF-1α</i> F  | TCCATGTGACCATGAGGAAA           | 160                      |
| <i>HIF-1α</i> R  | CTTCCACGTTGCTGACTTGA           |                          |
| <i>IL-1β</i> F   | TGAAGCAGCTATGGCAACTG           | 183                      |
| <i>IL-1β</i> R   | TTGTTGATGT GCTGCTGTGA          |                          |
| <i>IL-6</i> F    | AGTTGCCTTCTTGGGACTGA           | 159                      |
| <i>IL-6</i> R    | TCCACGATTTCCCAGAGAAC           |                          |
| <i>PCK1</i> F    | CTGCATAACGGTCTGGACTTC          | 159                      |
| <i>PCK1</i> R    | CAGCAACTGCCCCGTACTCC           |                          |
| <i>G6pc</i> F    | CGACTCGCTATCTCCAAGTGA          | 173                      |
| <i>G6pc</i> R    | GTTGAACCAGTCTCCGACCA           |                          |
| <i>Fbp1</i> F    | CACCGCGATCAAAGCCATCT           | 161                      |
| <i>Fbp1</i> R    | AGGTAGCGTAGGACGACTTCA          |                          |
| <i>PC</i> F      | CTGAAGTTCCAAACAGTTCGAGG        | 162                      |
| <i>PC</i> R      | CGCACGAAACACTCGGATG            |                          |

**Figure S1. The SUVmean and SUVmax values measured in the left hepatic parenchyma on the first and third post-irradiation days.** There was no significant increased FDG uptake between RT (n=6) group and no-RT (n=6) group in post-irradiation days.

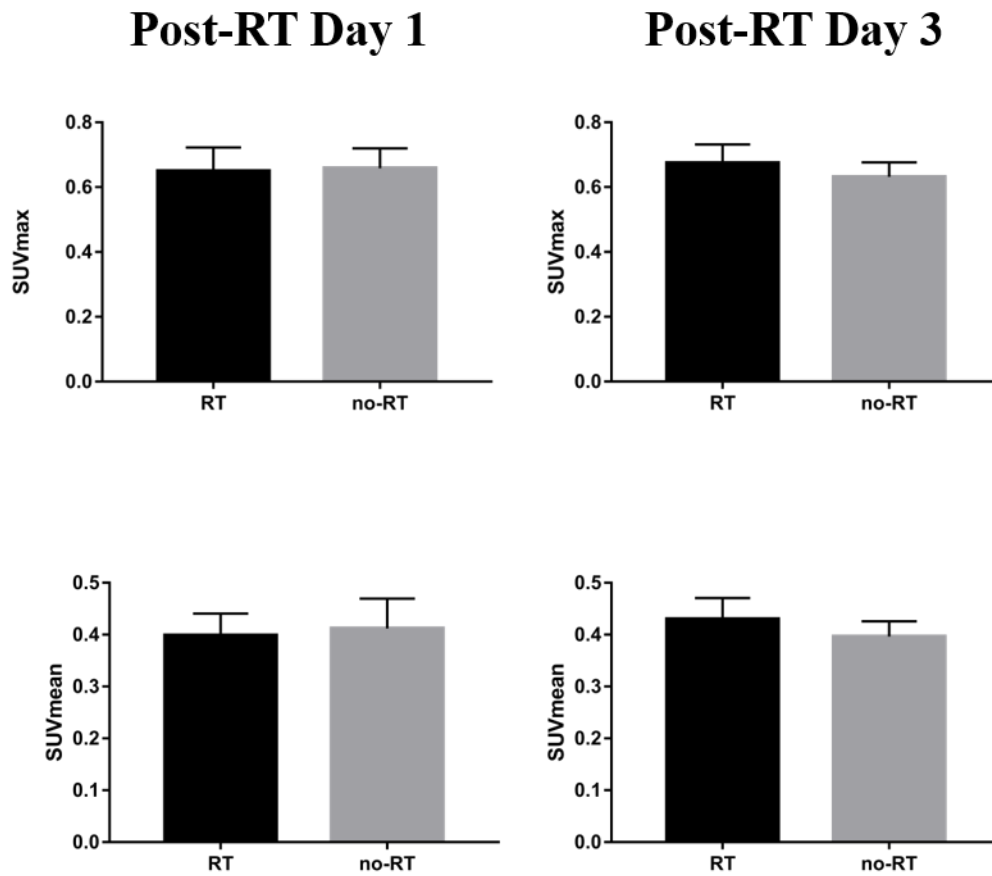

**Figure S2. The comparison of FDG uptake expressed as the ratio of right to left lobes in tumor-free animals with and without irradiation after 3 day RT.** In experiments conducted in tumor-free animals, the right-to-left ratio of  $^{18}\text{F}$ -FDG uptake in the liver parenchyma measured on post-RT day 3 was 1.13-fold higher in the RT (n=4) group compared with the no-RT (n=4) group ( $1.11 \pm 0.10$  *versus*  $0.98 \pm 0.03$ , respectively,  $p < 0.05$ ).

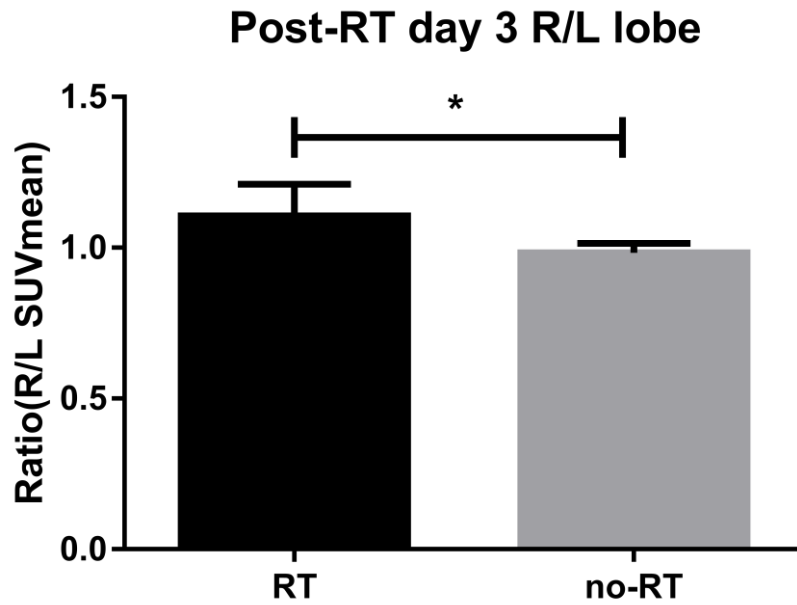

**Figure S3. Lymphocytes and macrophages subpopulations within liver parenchyma identified using CD8, F4/80 and CD68 immunohistochemical staining.** Representative section of right liver parenchyma stained with (a) CD8, F4/80, and CD68 on post-RT day 1 in the RT group, compared to the no-RT group. (b) CD8, F4/80, and CD68 on post-RT day 3 in the RT group, compared to the no-RT group. Nonetheless, there was no significant expansion of CD8<sup>+</sup> T cells as well as of the F4/80<sup>+</sup> or CD68<sup>+</sup> macrophage populations in liver tissues on post-RT days 1 and 3

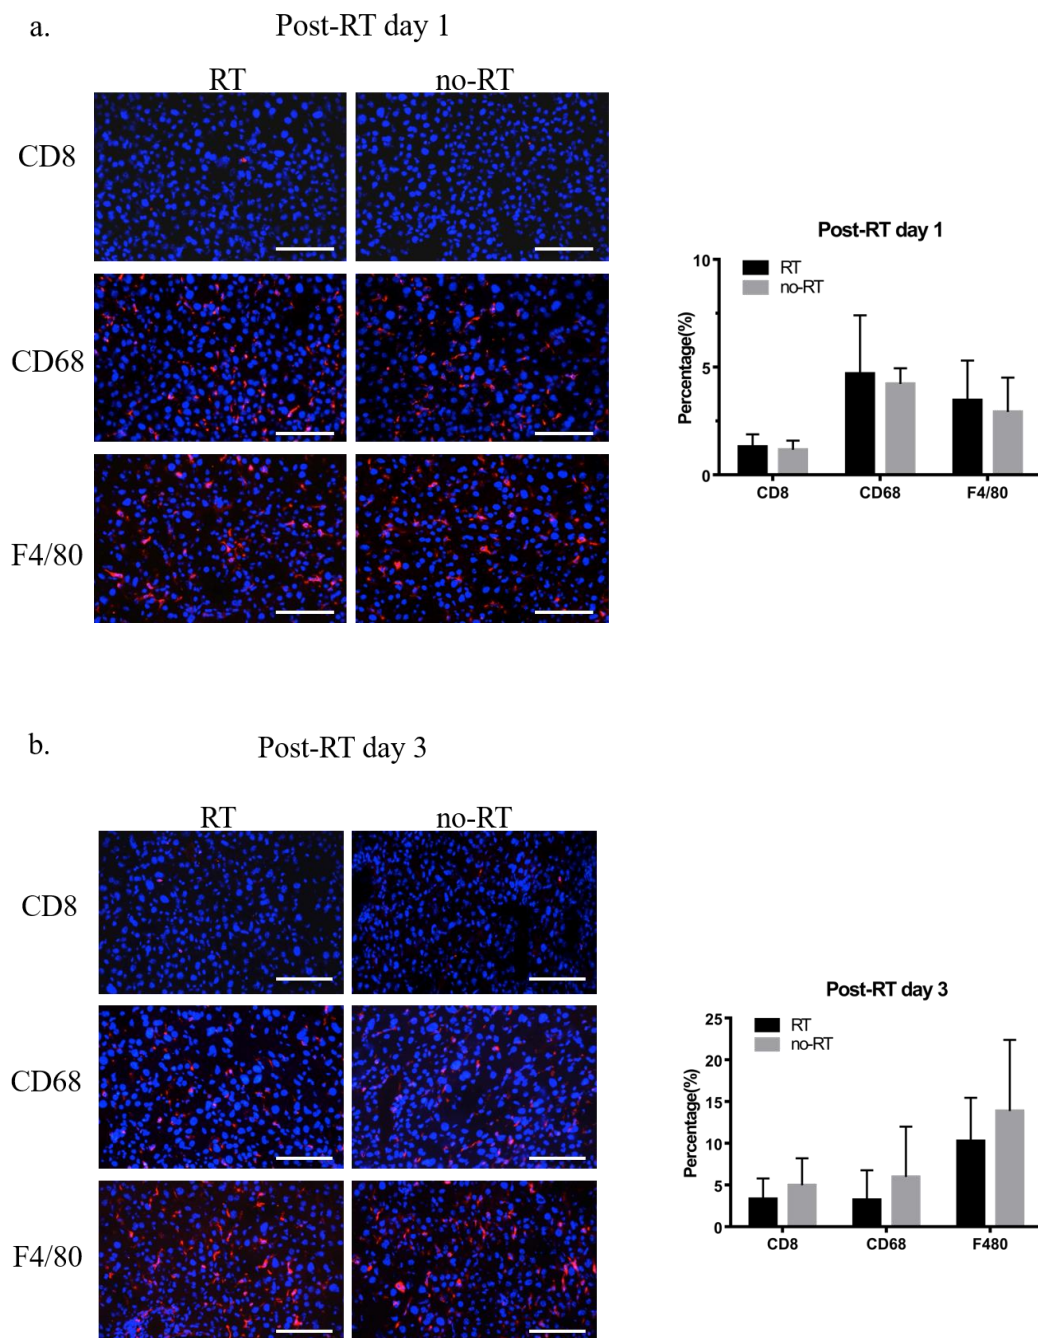

**Figure S4. Expression levels of genes encoding for pro-inflammatory cytokines in the RT and no-RT groups on the first and third post-irradiation days (left lobe of the liver).** On the first post-irradiation day, the expression levels of the IL-18 and IL-6 genes (expressed as fold-change) were significantly increased in the RT group – but not in the no-RT group. On the third post-irradiation day, the expression levels of the IL-1 $\beta$ , HIF-1 $\alpha$ , and IL-6 genes (expressed as fold-change) were significantly increased in the RT group – but not in the no-RT group.

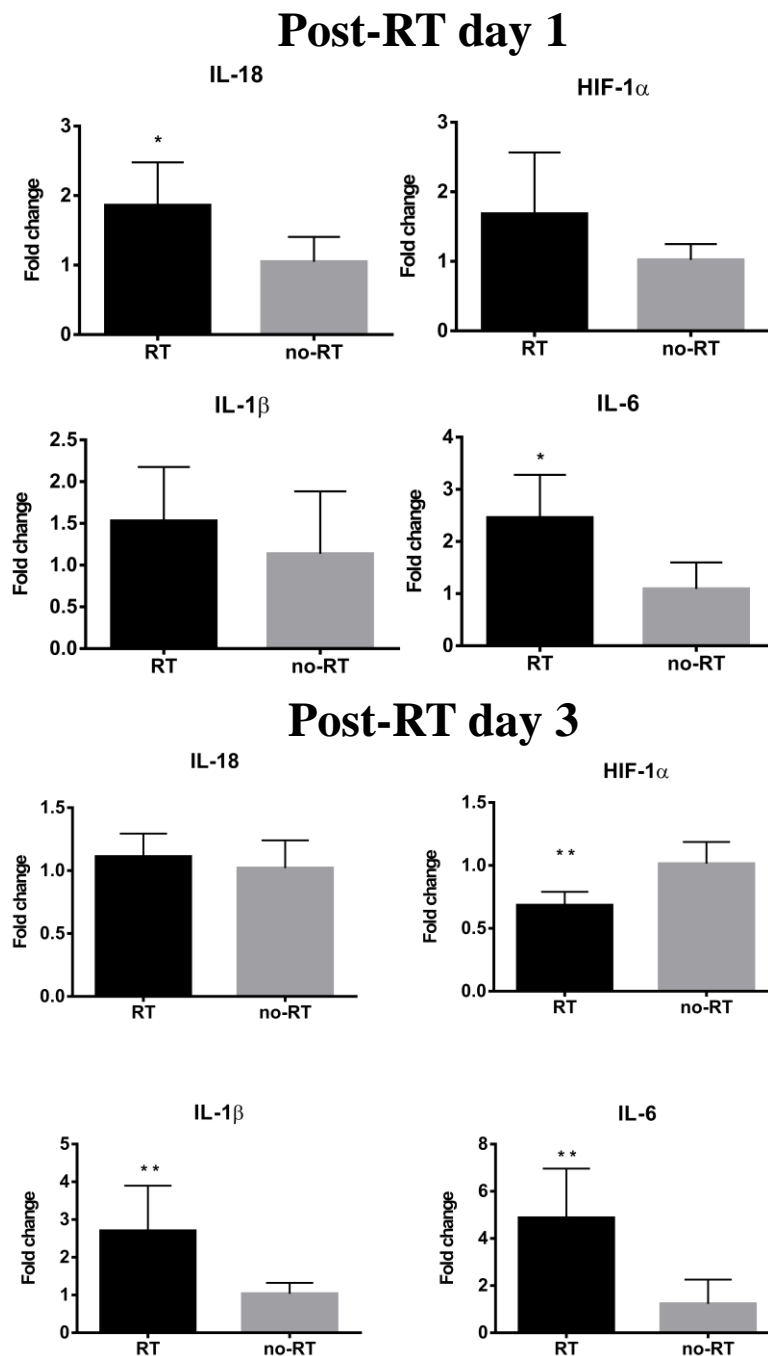

**Figure S5. The extent of liver damage was assessed by measuring serum levels of AST, ALT, and albumin on the first and third post-irradiation days.** Compared with control animals (n=3), the presence of experimental tumors resulted in increased ALT ( $36.4 \pm 11.00$  versus  $52.67 \pm 8.08$  IU/L, respectively,  $p = 0.021$ ) and albumin levels. However, ALT, AST and albumin levels did not show significant differences in the RT (n=3) and no-RT (n=3) groups on post-RT neither day 1 nor day 3.

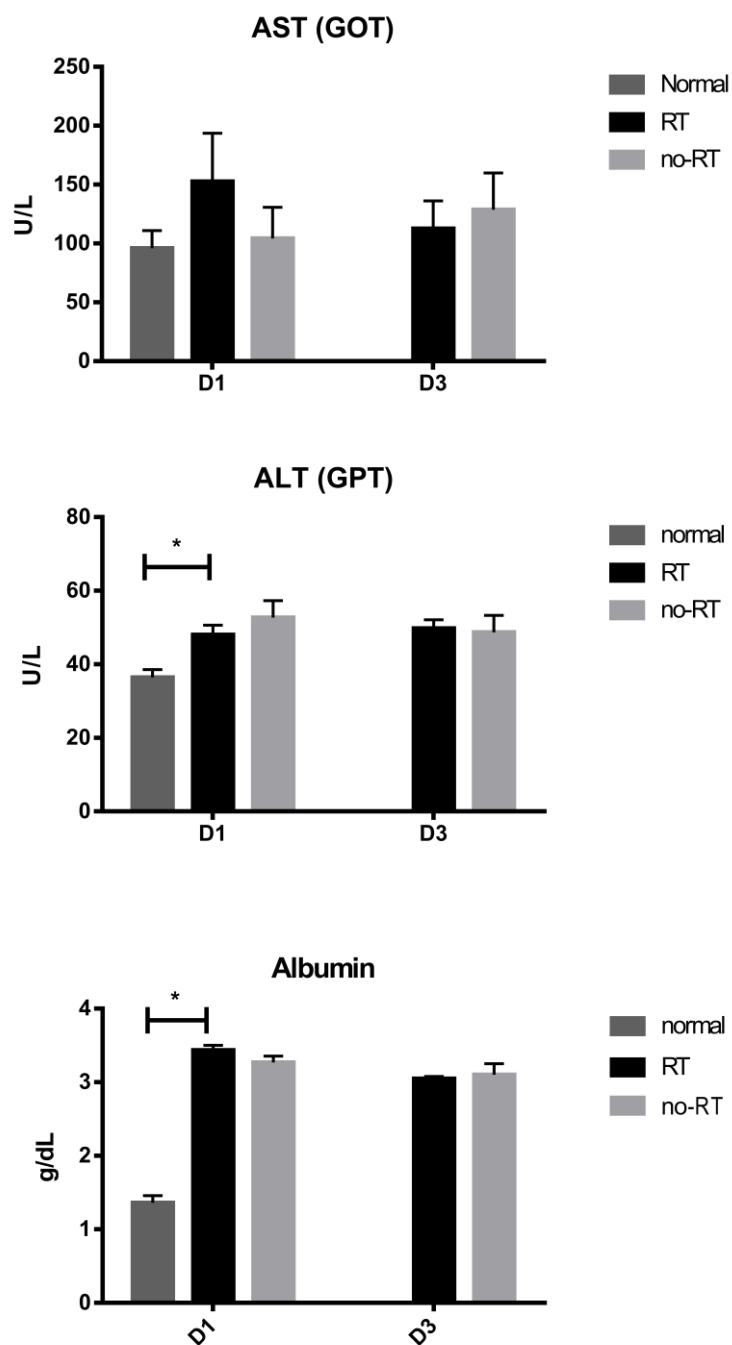

**Table S2. Predicted (MetaboAnalyst 3.0) alterations in metabolic pathways in the right and left lobes of the liver on the first and third post-irradiation days**

| <i>Region</i>               | <i>Metabolic pathway</i>                         | <i>P</i> |
|-----------------------------|--------------------------------------------------|----------|
| <b><u>Post-RT day 1</u></b> |                                                  |          |
| Right lobe                  | Starch and sucrose metabolism                    | <0.001   |
|                             | Galactose metabolism                             | <0.001   |
|                             | Neomycin, kanamycin, and gentamicin biosynthesis | 0.005    |
| Left lobe                   | Galactose metabolism                             | 0.008    |
|                             | Alanine, aspartate, and glutamate metabolism     | 0.009    |
|                             | Neomycin, kanamycin, and gentamicin biosynthesis | 0.01     |
| <b><u>Post-RT day 3</u></b> |                                                  |          |
| Right lobe                  | Glycine, serine, and threonine metabolism        | <0.001   |
|                             | Arginine and proline metabolism                  | 0.003    |
|                             | Alanine, aspartate, and glutamate metabolism     | 0.02     |
|                             | Glyoxylate and dicarboxylate metabolism          | 0.025    |
|                             | Nitrogen metabolism                              | 0.047    |
|                             | D-glutamine and D-glutamate metabolism           | 0.047    |
| Left lobe                   | Glycine, serine, and threonine metabolism        | <0.001   |
|                             | Tricarboxylic acid cycle                         | 0.003    |
|                             | Alanine, aspartate, and glutamate metabolism     | 0.007    |
|                             | Riboflavin metabolism                            | 0.018    |
